# Supplementary material for: GABenchToB: A Genome Assembly Benchmark Tuned on Bacteria and Benchtop Sequencers
Source: PubMed Central journal article supplement (PMC4157817; doi:10.1371/journal.pone.0107014), 2014-09-08
Supplement: pone.0107014.s001.pdf [file pone.0107014.s001.pdf]

ABYSS ○ —

CLC ○ —

SPADES ○ —

CELERA ○ —

NEWBLER ○ —

MIRA ○ —

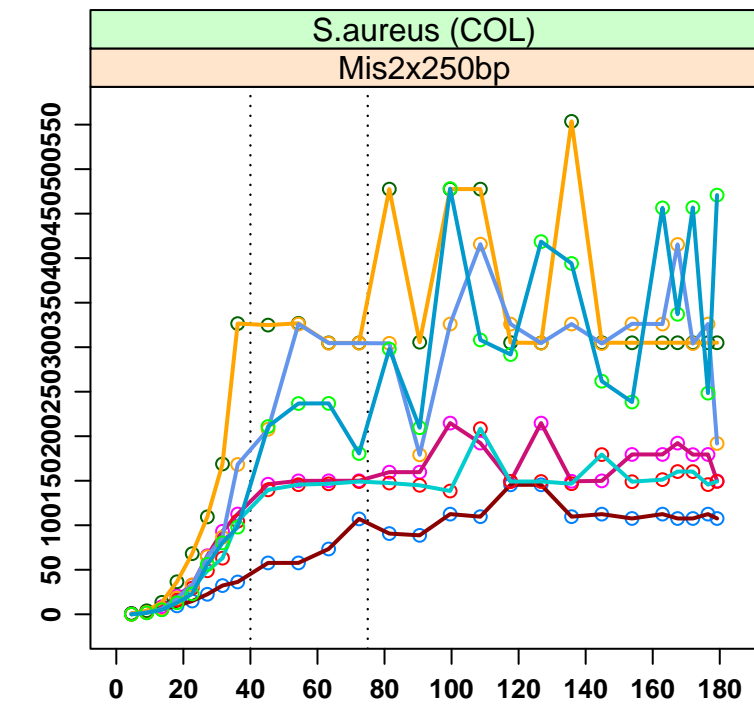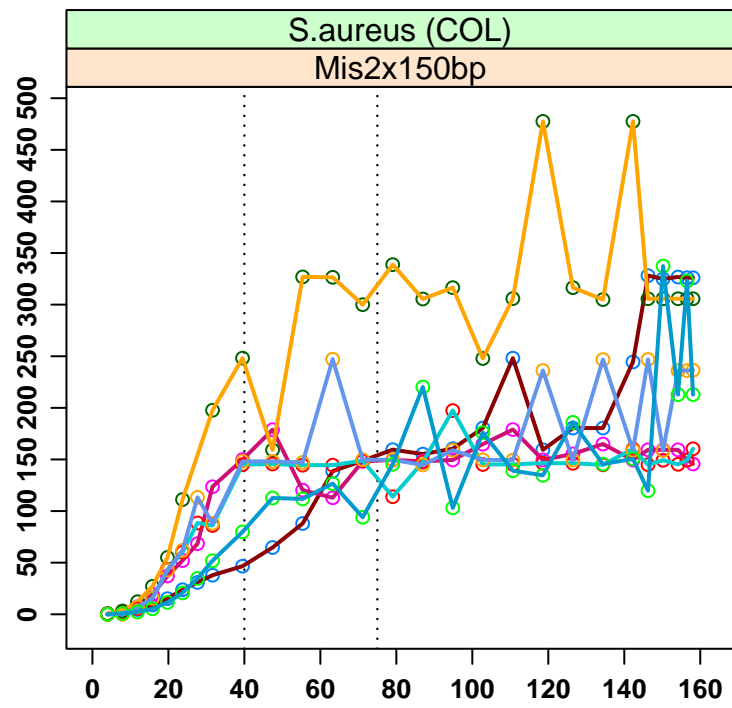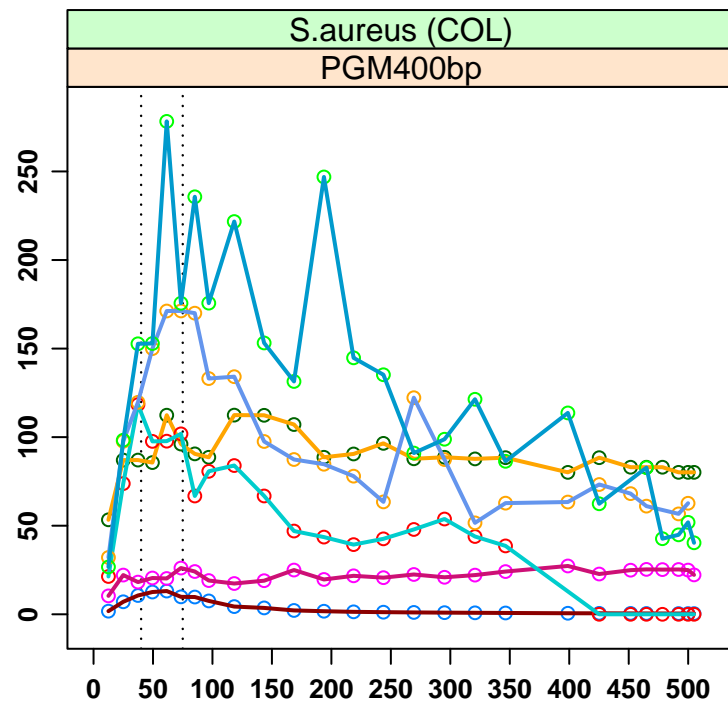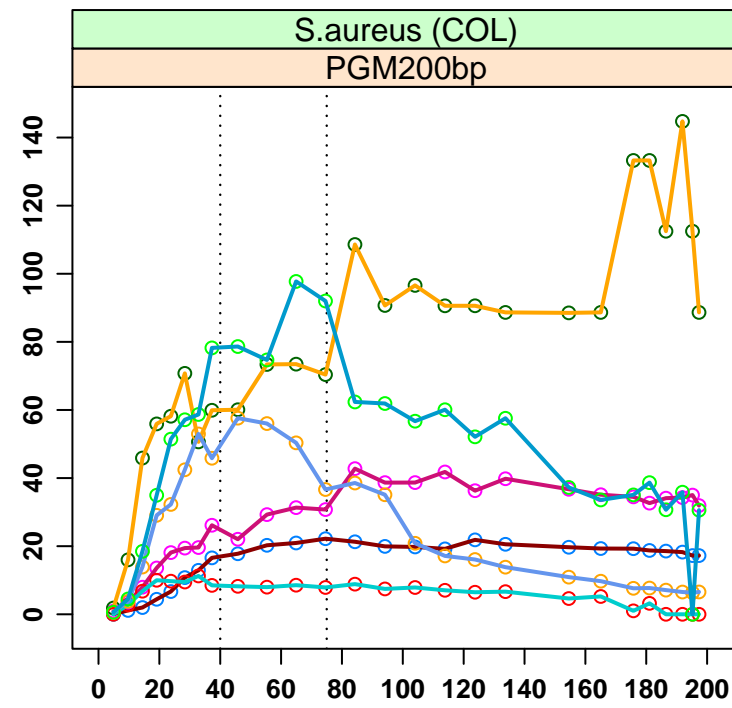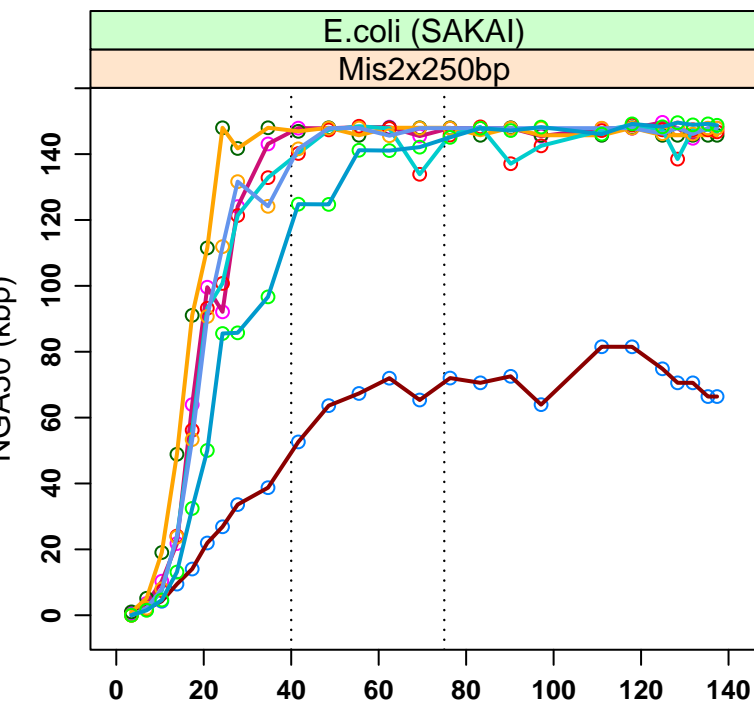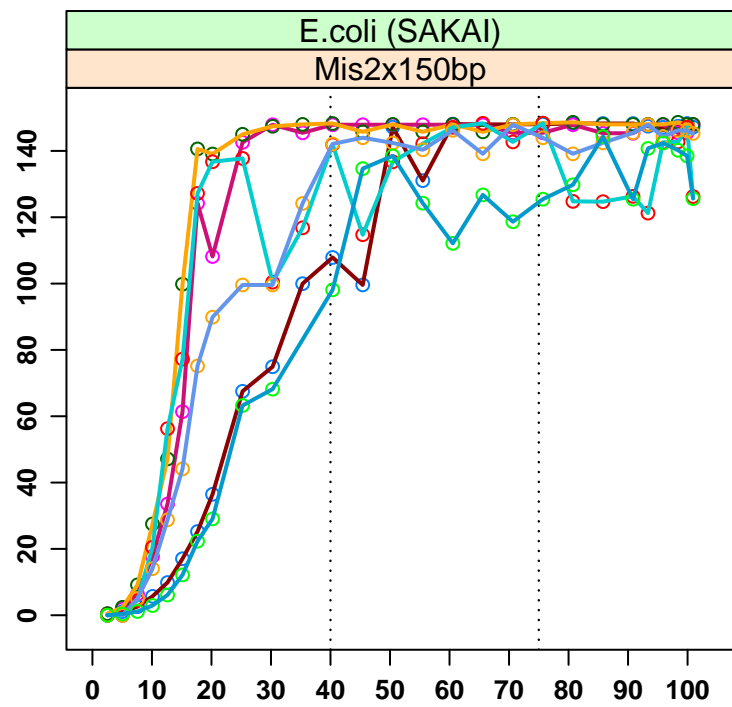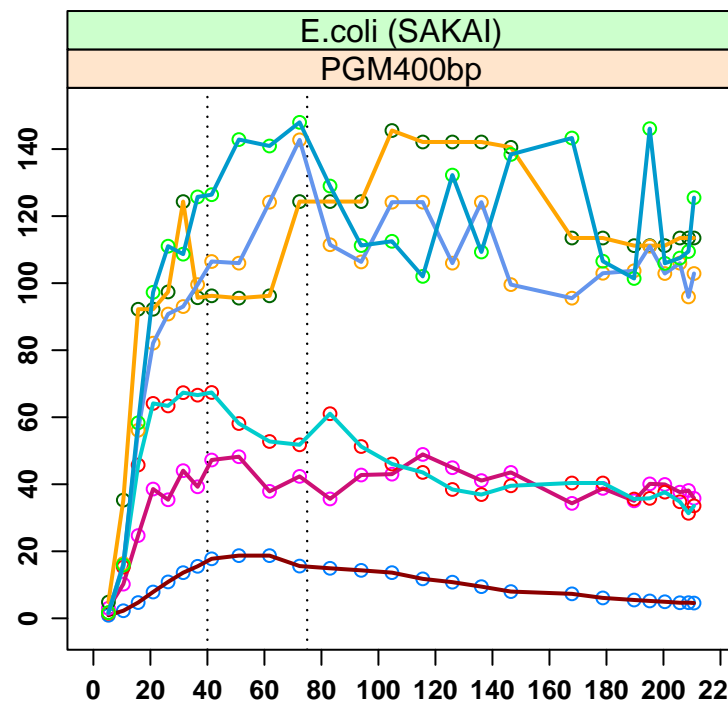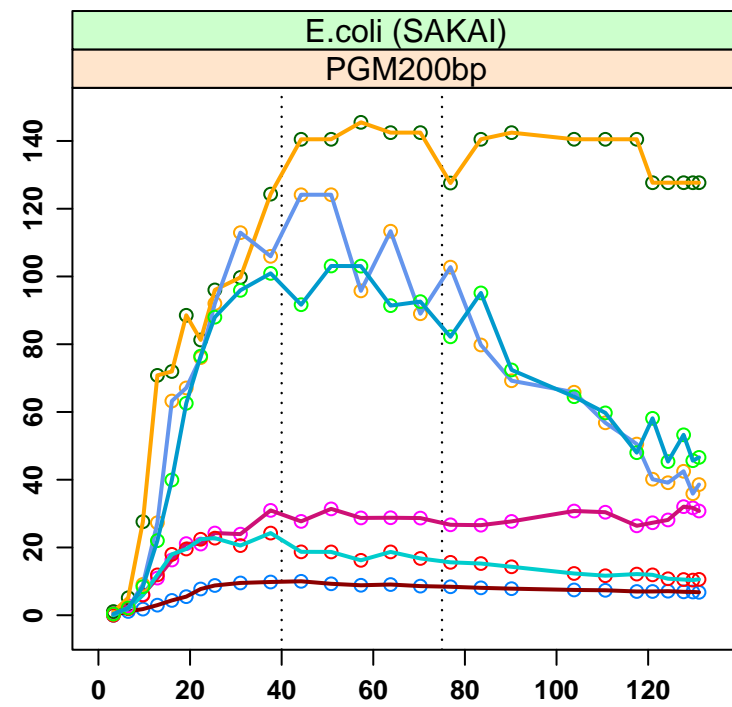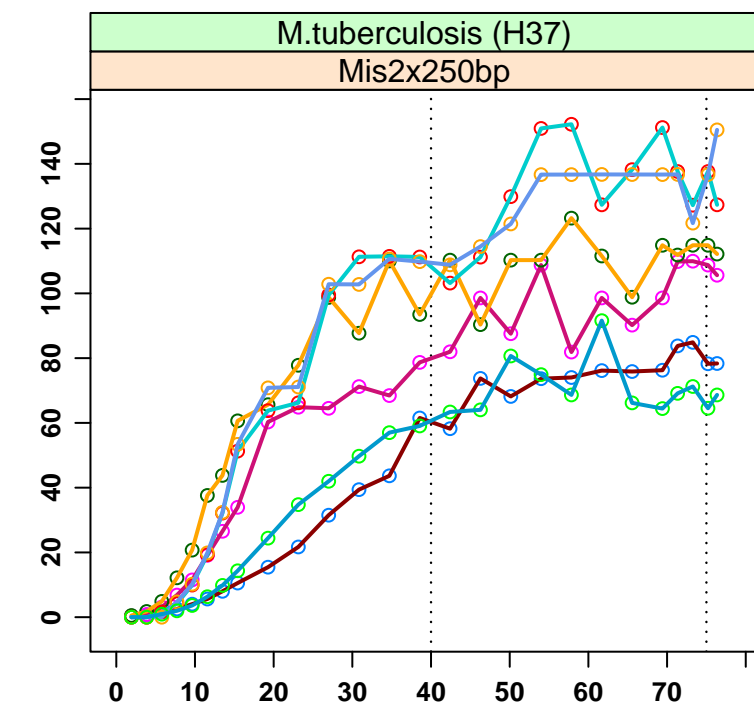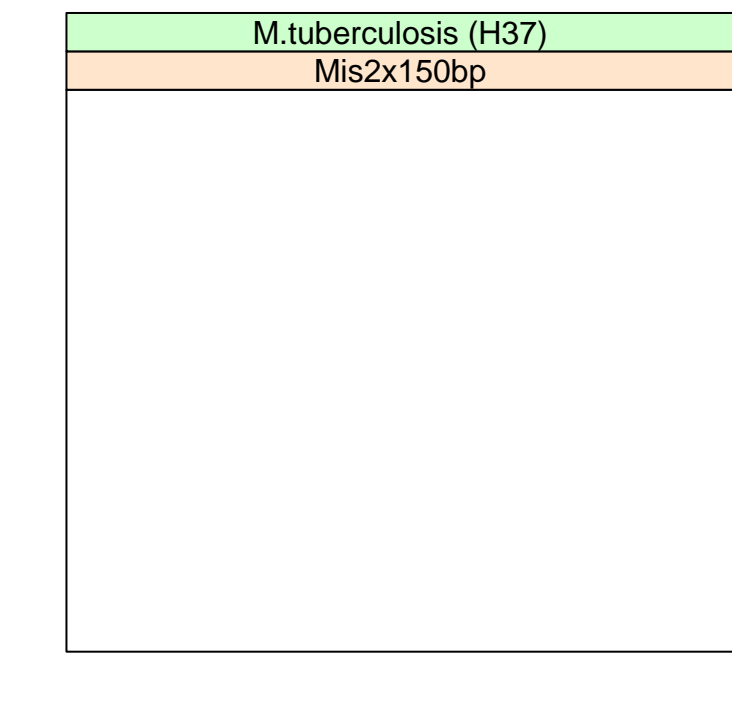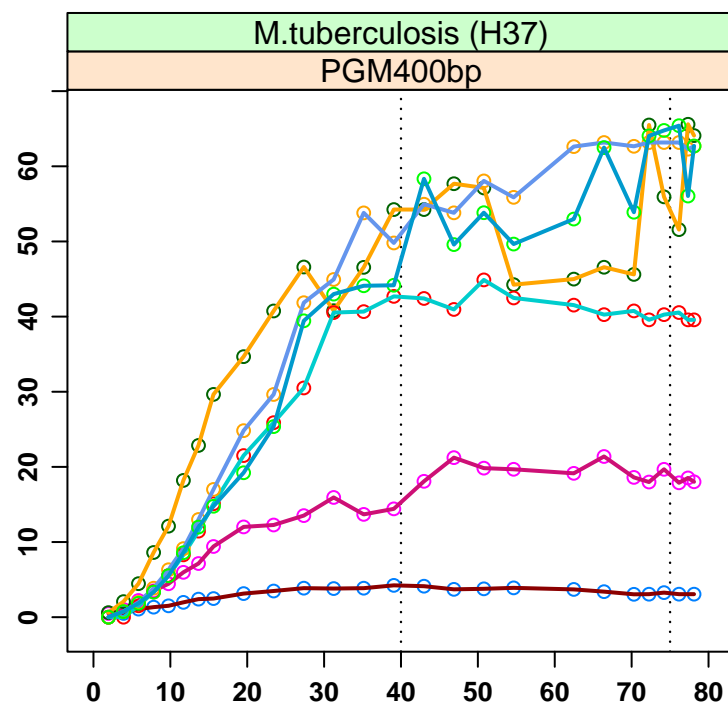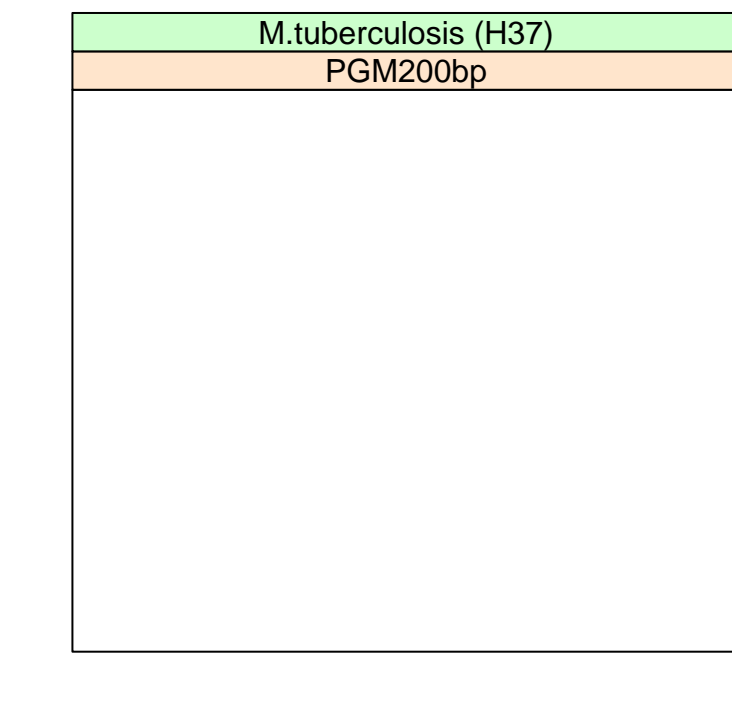

Coverage
