# Supplementary material for: GABenchToB: A Genome Assembly Benchmark Tuned on Bacteria and Benchtop Sequencers
Source: PubMed Central journal article supplement (PMC4157817; doi:10.1371/journal.pone.0107014), 2014-09-08
Supplement: pone.0107014.s005.pdf [file pone.0107014.s005.pdf]

ABYSS ○ — —   
 CLC ○ — —   
 SPADES ○ — —   
 CELERA ○ — —   
 NEWBLER ○ — —   
 MIRA ○ — —

#Mis-assemblies

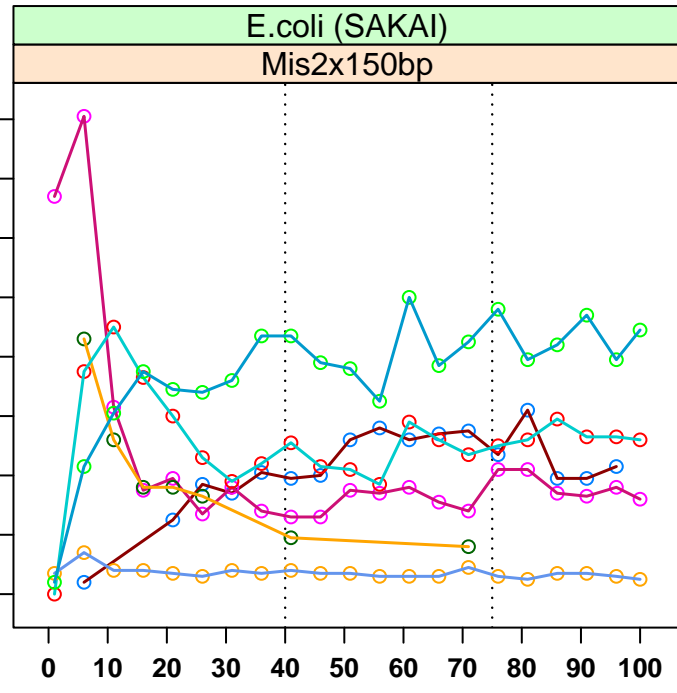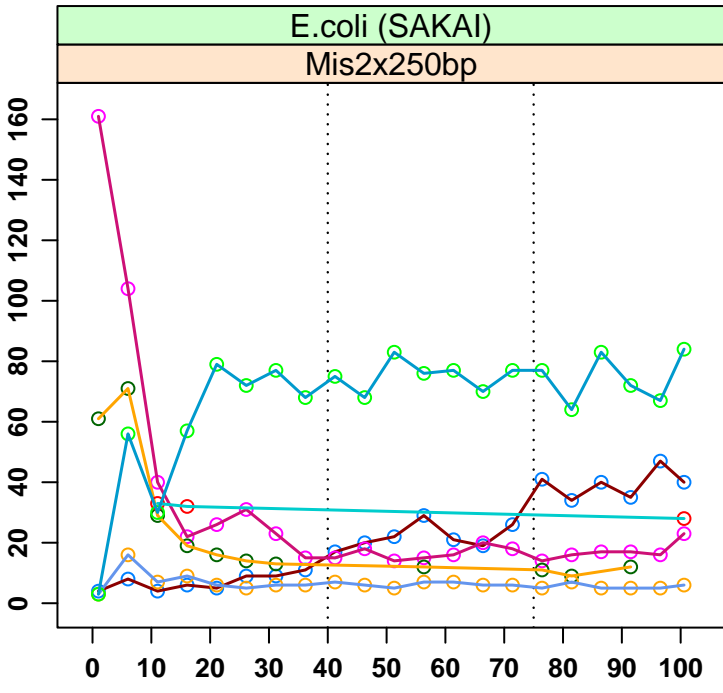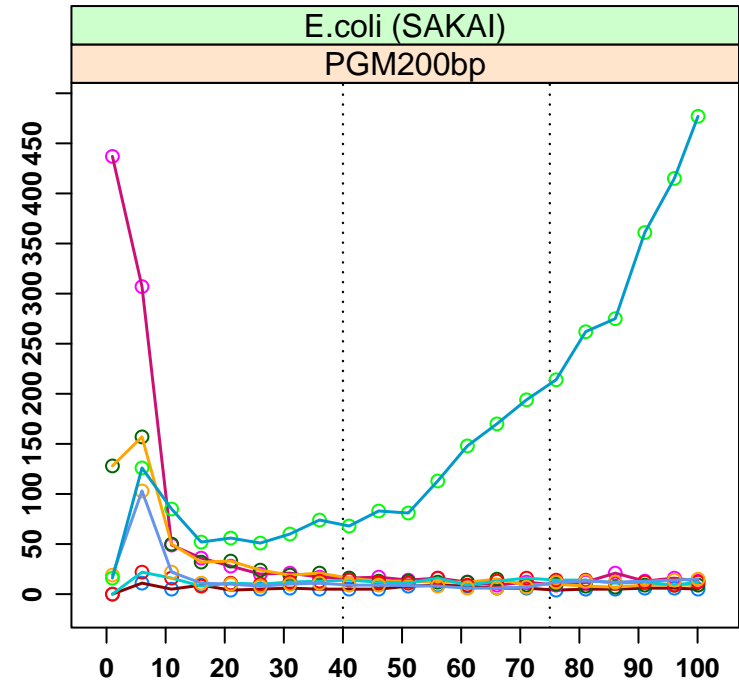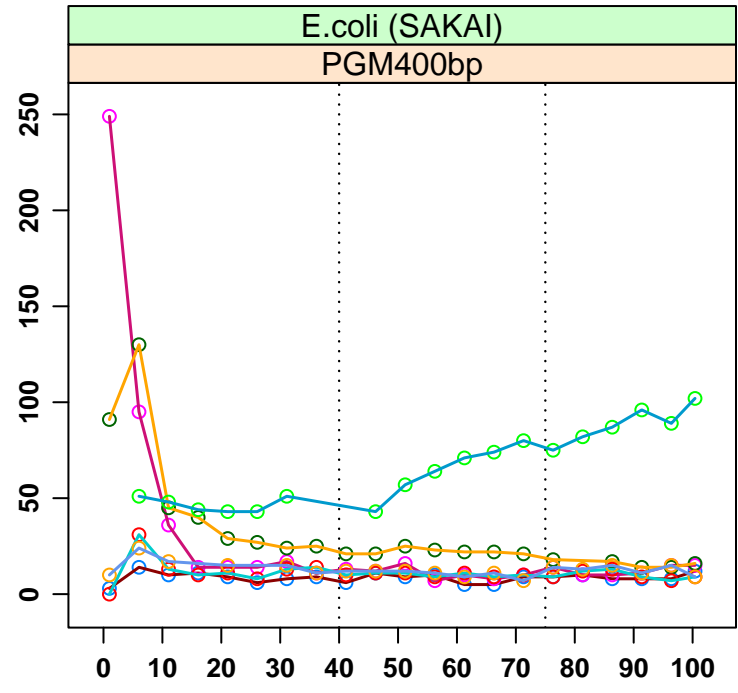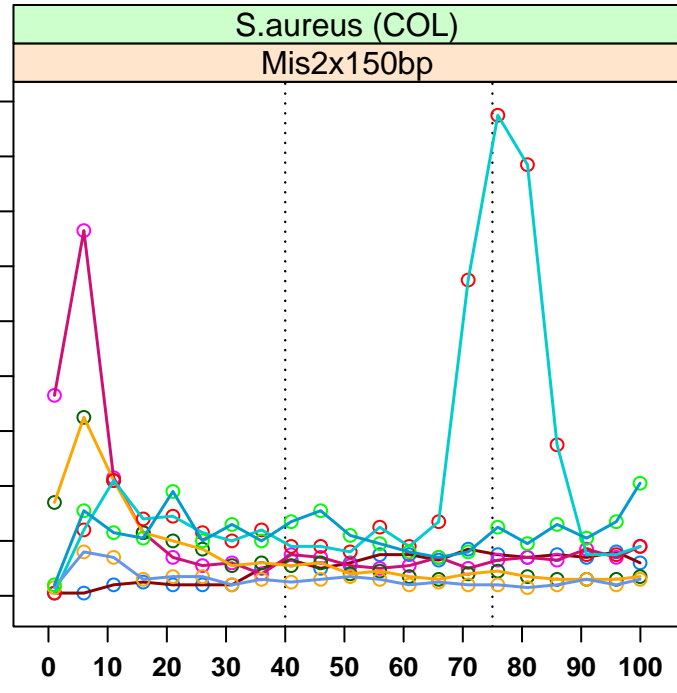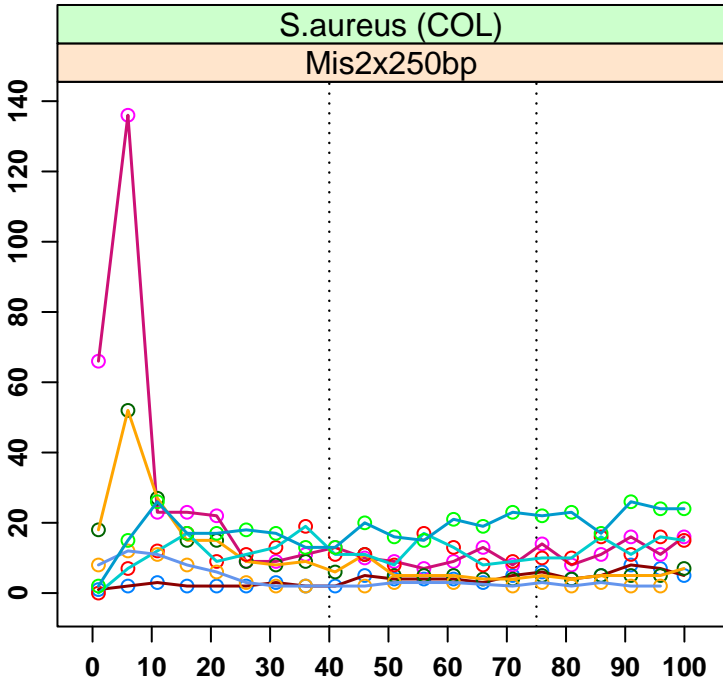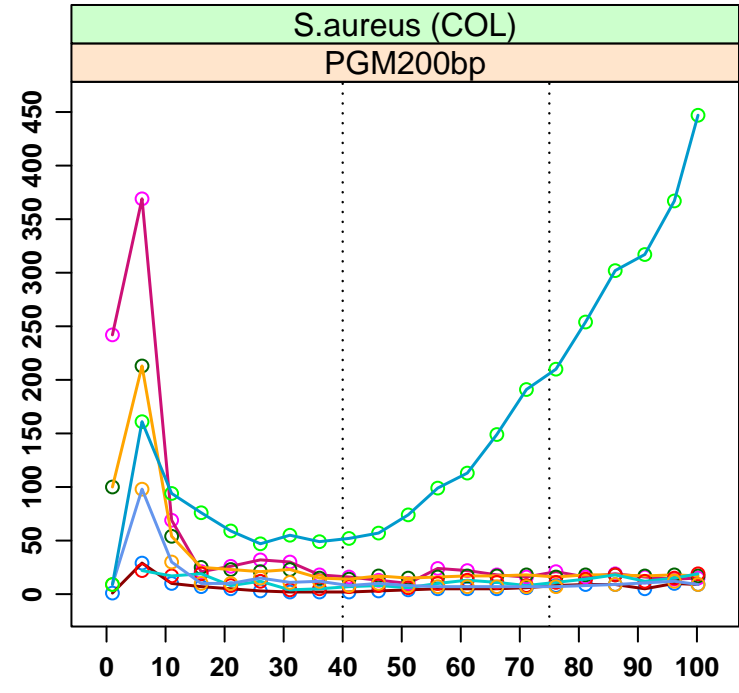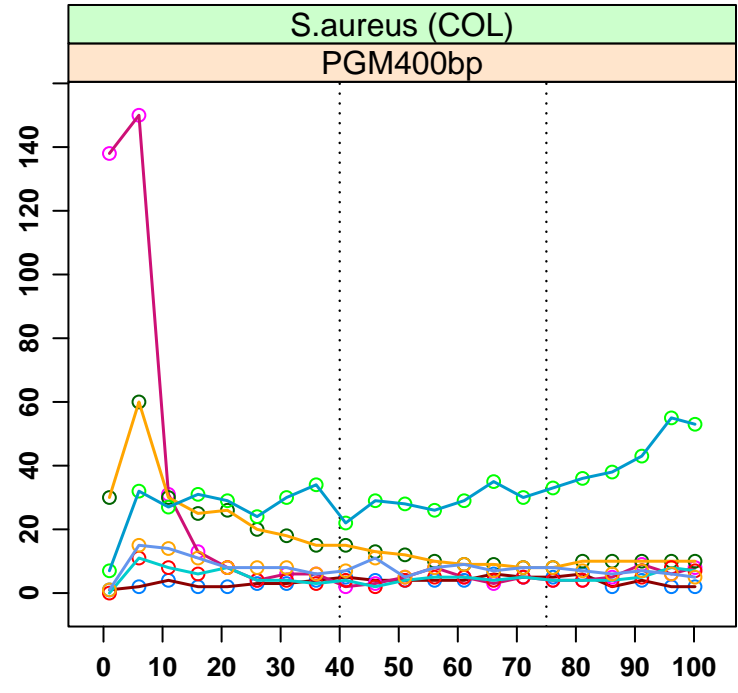

Coverage
