# Supplementary material for: GABenchToB: A Genome Assembly Benchmark Tuned on Bacteria and Benchtop Sequencers
Source: PubMed Central journal article supplement (PMC4157817; doi:10.1371/journal.pone.0107014), 2014-09-08

**A**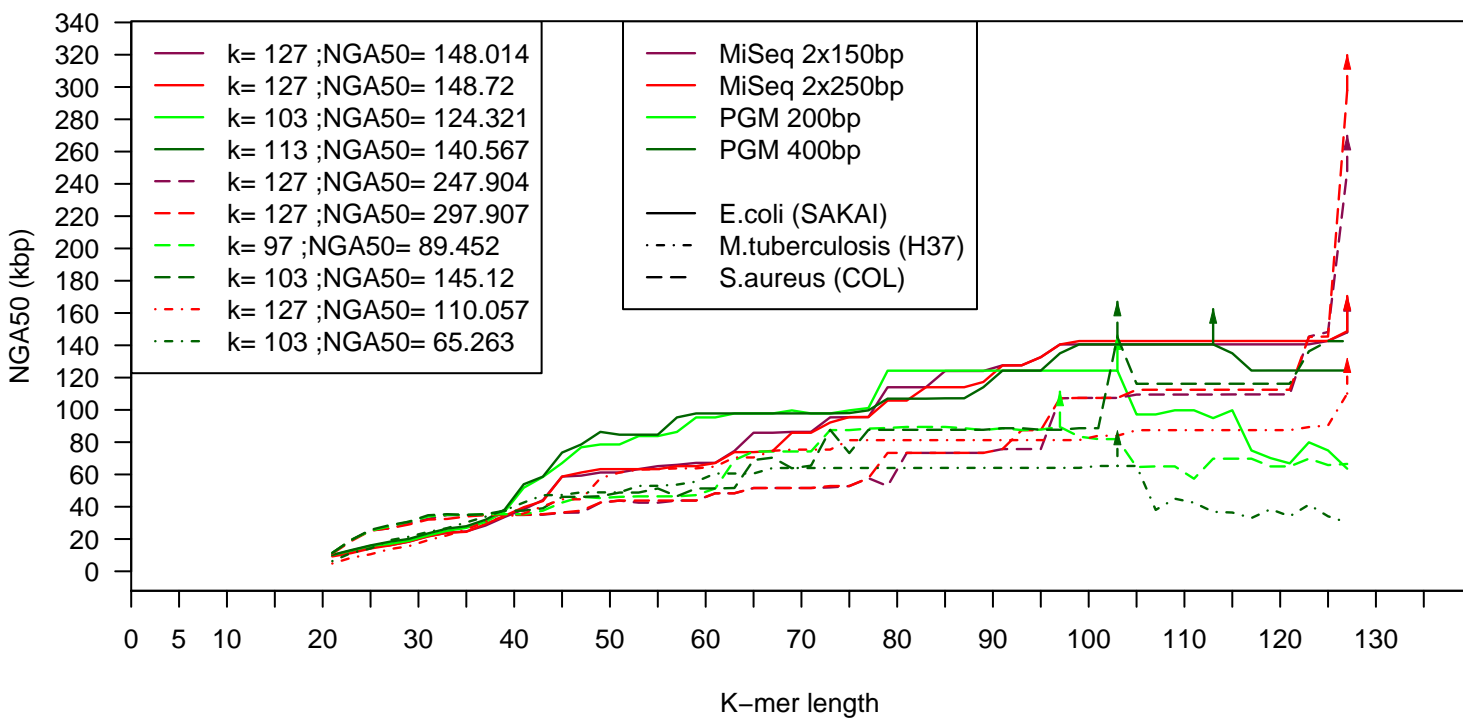**B**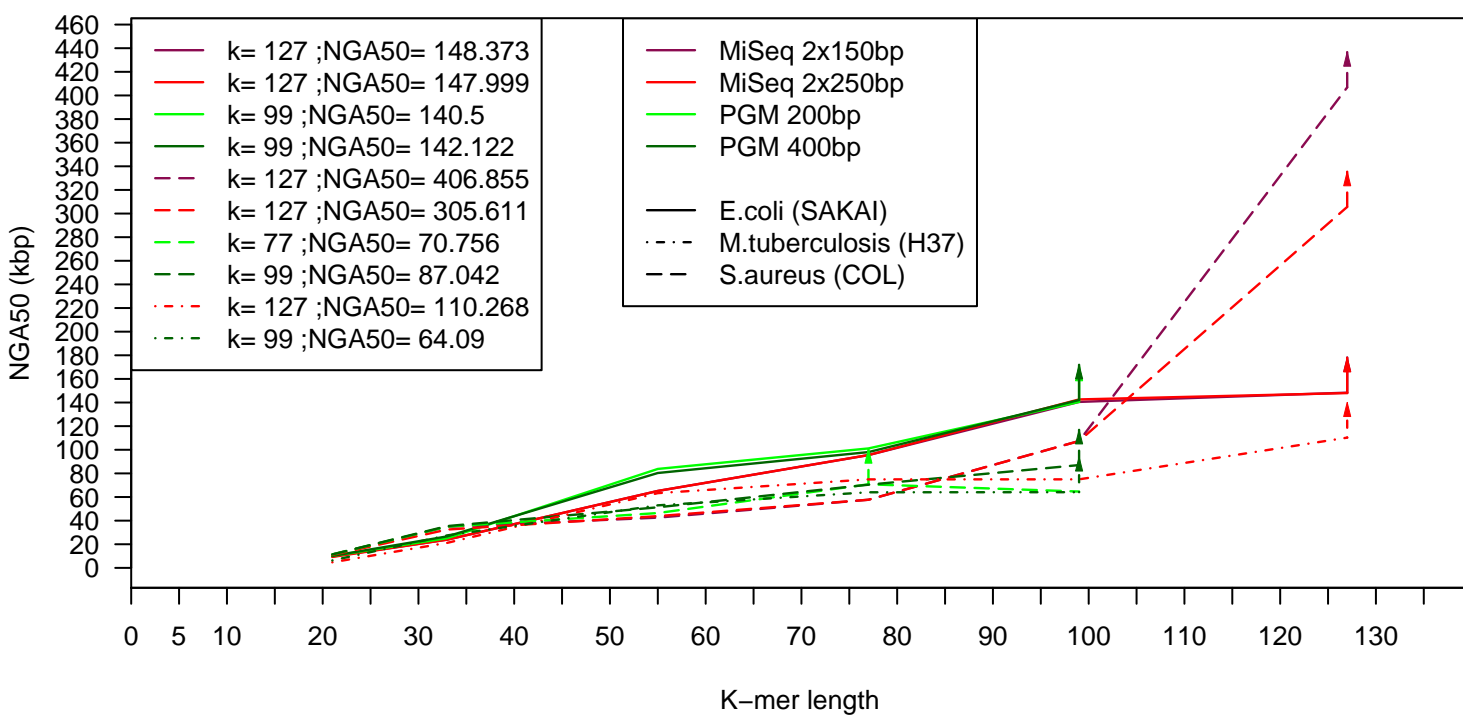

Supplement: pone.0107014.s007.pdf [file pone.0107014.s007.pdf]
